# Supplementary material for: Development of Polyoxymethylene/Polylactide Blends for a Potentially Biodegradable Material: Crystallization Kinetics, Lifespan Prediction, and Enzymatic Degradation Behavior
Source: PubMed Central journal article supplement (PMC6780351; doi:10.3390/polym11091516), 2019-09-18
Supplement: polymers-11-01516-s001.pdf [file polymers-11-01516-s001.pdf]

## *Supplementary Materials*

# **Development of Polyoxymethylene/Poly lactide Blends for a Potentially Biodegradable Material: Crystallization Kinetics, Lifespan Prediction and Enzymatic Degradation Behavior**

Jianhua Li <sup>1,2</sup>, Yatao Wang <sup>2</sup>, Xiaodong Wang <sup>1,\*</sup> and Dezhen Wu <sup>1,\*</sup>

<sup>1</sup> State Key Laboratory of Organic–Inorganic Composites, Beijing University of Chemical Technology, Beijing 100029, China

<sup>2</sup> Coal Chemical R & D Center, Kailuan Group Limited Liability Corporation, Tangshan, Hebei 063018, China

\* Correspondence: wangxdfox@aliyun.com (X.W.); wdz@mail.buct.edu.cn (D.W.); Tel.: +86-10-6442-1693 (X.W.)

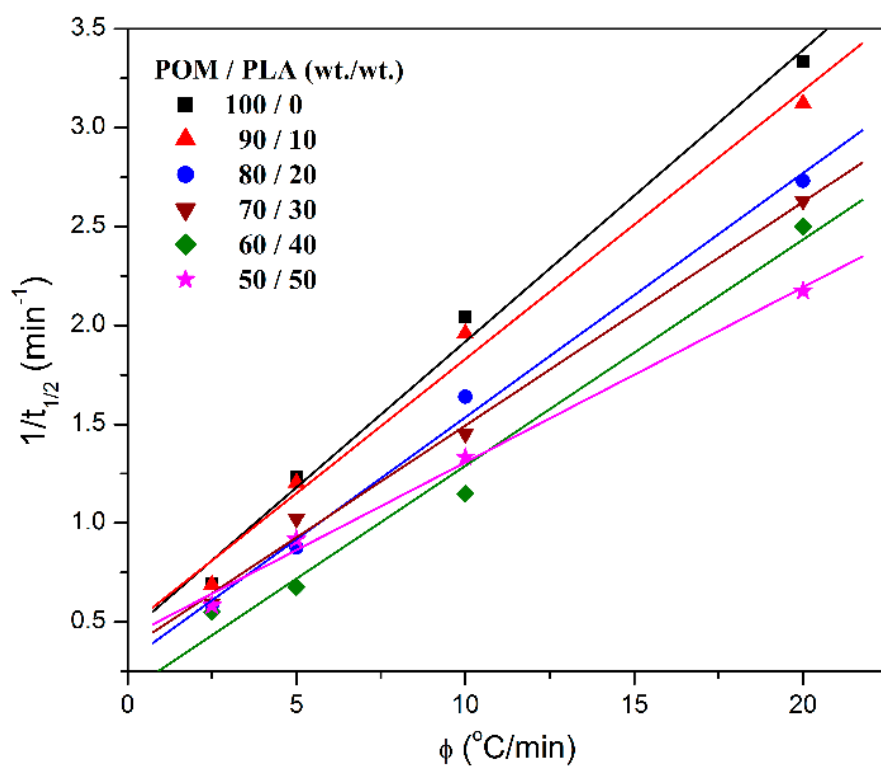

**Figure S1** Plots of reciprocal half-time ( $1/t_{1/2}$ ) of crystallization as a function of cooling rate for pure POM and its blends with PLA.

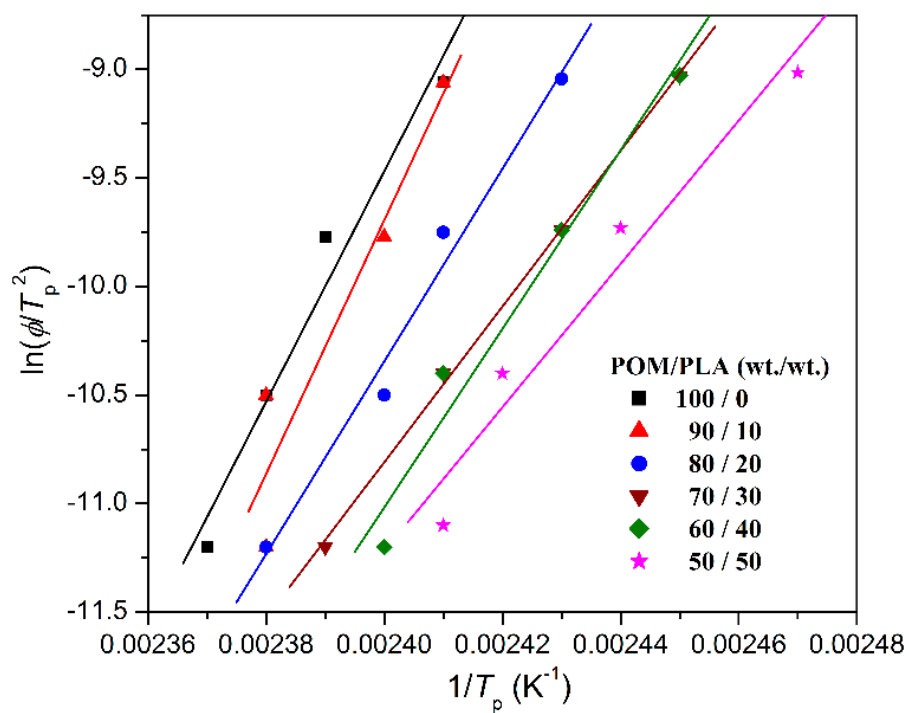

**Figure S2** Kissinger plots of  $\ln(\phi/T_p^2)$  versus  $1/T_p$  for the non-isothermal crystallization of pure POM and its blends with PLA.

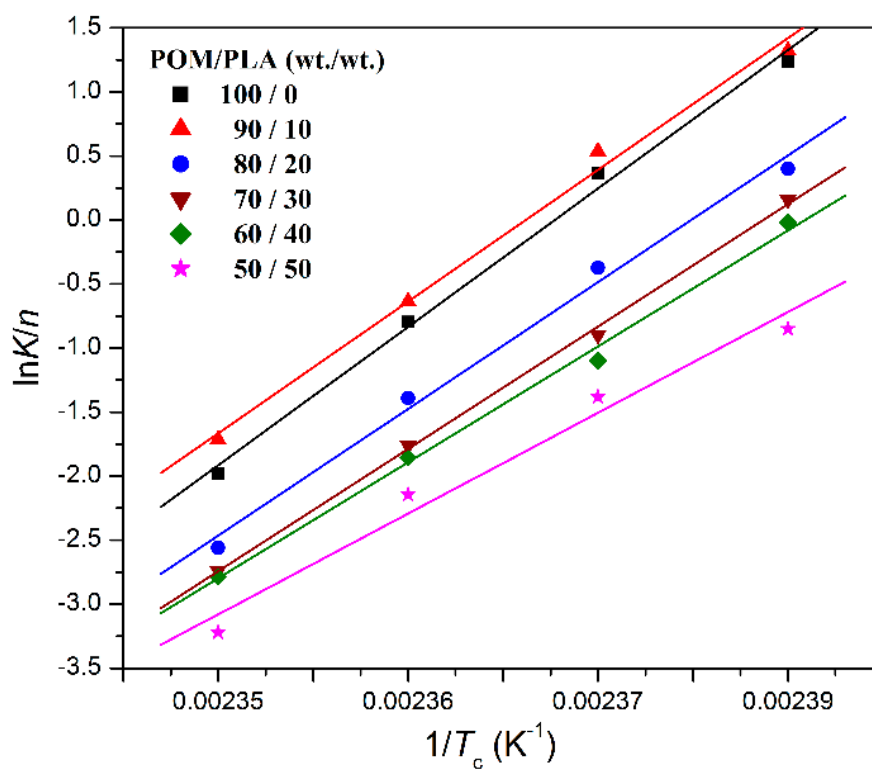

**Figure S3** Arrhenius plots of  $\ln K/n$  versus  $1/T_c$  for the isothermal crystallization of pure POM and its blends with PLA.

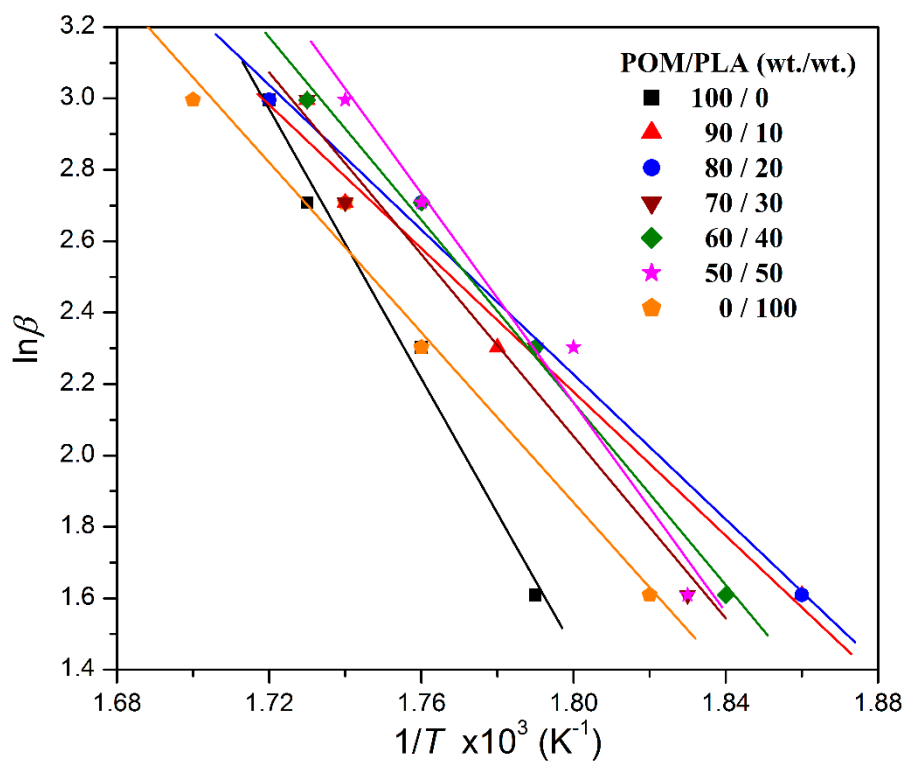

**Figure S4** Flynn-Wall plots of  $\ln\beta$  versus  $1/T_{\max}$  for the thermal degradation reaction of POM/PLA blends.

**Table S1.** The thermal degradation temperatures as a function of percentage conversion for pure POM, PLA and POM/PLA blends at different heating rates.

| $\beta$ (°C/min) | Conversion (%) | Thermal degradation temperature (°C) |          |                 |                 |                 |                 |                 |
|------------------|----------------|--------------------------------------|----------|-----------------|-----------------|-----------------|-----------------|-----------------|
|                  |                | Pure POM                             | Pure PLA | POM+10 wt % PLA | POM+20 wt % PLA | POM+30 wt % PLA | POM+40 wt % PLA | POM+50 wt % PLA |
| 5                | 5              | 285.6                                | 277.1    | 275.0           | 265.1           | 272.0           | 270.4           | 273.6           |
|                  | 10             | 307.5                                | 285.3    | 286.8           | 279.6           | 284.6           | 283.1           | 284.1           |
|                  | 20             | 326.7                                | 291.8    | 306.6           | 294.7           | 295.8           | 293.9           | 294.0           |
|                  | 30             | 339.3                                | 296.3    | 318.8           | 303.5           | 301.6           | 300.1           | 299.8           |
|                  | 40             | 348.5                                | 299.6    | 338.6           | 312.0           | 305.7           | 303.5           | 304.0           |
|                  | 50             | 355.9                                | 301.9    | 359.7           | 322.6           | 308.9           | 306.8           | 307.4           |
|                  | 60             | 363.0                                | 304.3    | 370.8           | 348.7           | 314.9           | 309.5           | 310.4           |
|                  | 70             | 371.5                                | 306.4    | 379.3           | 365.6           | 339.6           | 313.2           | 313.5           |
|                  | 80             | 382.9                                | 309.0    | 386.8           | 376.8           | 368.2           | 321.6           | 317.3           |
| 10               | 5              | 296.6                                | 293.7    | 290.9           | 284.6           | 288.8           | 287.7           | 287.8           |
|                  | 10             | 313.7                                | 300.9    | 312.6           | 299.7           | 299.0           | 299.6           | 293.5           |
|                  | 20             | 336.1                                | 309.7    | 327.3           | 312.4           | 310.9           | 312.2           | 305.7           |
|                  | 30             | 350.9                                | 315.7    | 337.3           | 319.6           | 316.8           | 318.6           | 313.8           |
|                  | 40             | 363.8                                | 319.9    | 347.7           | 325.3           | 321.1           | 322.6           | 319.7           |
|                  | 50             | 375.2                                | 323.8    | 371.9           | 332.7           | 325.2           | 326.8           | 324.1           |
|                  | 60             | 386.7                                | 326.2    | 385.8           | 346.8           | 331.1           | 330.1           | 328.2           |
|                  | 70             | 397.1                                | 329.2    | 395.6           | 367.7           | 339.6           | 334.6           | 331.8           |
|                  | 80             | 406.7                                | 332.1    | 403.8           | 384.6           | 369.7           | 342.8           | 336.0           |

|    |    |       |       |       |       |       |       |       |
|----|----|-------|-------|-------|-------|-------|-------|-------|
|    | 90 | 416.6 | 335.1 | 413.3 | 396.8 | 388.9 | 376.6 | 344.6 |
| 15 | 5  | 304.2 | 302.4 | 300.1 | 293.8 | 300.9 | 295.6 | 297.3 |
|    | 10 | 322.3 | 311.0 | 320.3 | 307.5 | 314.4 | 308.4 | 306.4 |
|    | 20 | 345.6 | 319.1 | 338.1 | 321.6 | 325.6 | 321.8 | 318.1 |
|    | 30 | 361.6 | 324.2 | 347.6 | 330.6 | 331.1 | 329.2 | 325.7 |
|    | 40 | 375.1 | 328.8 | 356.0 | 337.6 | 335.7 | 334.4 | 331.7 |
|    | 50 | 387.7 | 331.8 | 372.0 | 345.7 | 339.5 | 338.5 | 336.7 |
|    | 60 | 399.0 | 334.8 | 389.0 | 358.8 | 344.6 | 342.8 | 341.3 |
|    | 70 | 409.1 | 337.6 | 400.1 | 378.9 | 350.9 | 346.5 | 345.6 |
|    | 80 | 418.6 | 340.1 | 409.6 | 392.6 | 368.0 | 352.6 | 350.5 |
|    | 90 | 428.6 | 342.8 | 418.8 | 403.7 | 400.7 | 369.2 | 363.2 |
| 20 | 5  | 307.3 | 318.5 | 305.5 | 309.4 | 306.2 | 305.3 | 302.0 |
|    | 10 | 325.6 | 326.6 | 324.5 | 322.8 | 320.5 | 320.2 | 312.9 |
|    | 20 | 348.9 | 335.6 | 338.9 | 335.5 | 332.9 | 333.3 | 326.4 |
|    | 30 | 364.8 | 341.7 | 347.8 | 342.6 | 339.6 | 341.1 | 334.8 |
|    | 40 | 378.8 | 346.1 | 355.7 | 348.6 | 344.6 | 346.6 | 340.9 |
|    | 50 | 391.5 | 349.8 | 368.5 | 354.6 | 348.7 | 350.7 | 346.5 |
|    | 60 | 403.4 | 353.6 | 388.1 | 363.4 | 353.5 | 354.6 | 350.9 |
|    | 70 | 414.2 | 356.8 | 401.6 | 384.9 | 359.7 | 358.1 | 355.7 |
|    | 80 | 423.7 | 360.6 | 412.4 | 401.8 | 371.5 | 363.0 | 360.0 |
|    | 90 | 434.5 | 364.5 | 422.9 | 414.1 | 401.0 | 369.1 | 366.0 |

---
